# Supplementary material
Source: MDPI journal article supplement (https://www.mdpi.com/1099-4300/23/12/1695)
Supplement: s1 [file s1]

# Supplementary Materials:

Subash Prakash <sup>1</sup>, Vishnu Unnikrishnan <sup>1</sup>, Rüdiger Pryss <sup>2</sup>, Robin Kraft <sup>3</sup>, Johannes Schobel <sup>4</sup>, Ronny Hannemann <sup>5</sup>, Berthold Langguth <sup>6</sup>, Winfried Schlee <sup>6</sup>, Myra Spiliopoulou <sup>1</sup>

## 1. Comparison over the similarity constructed through Loudness-s02

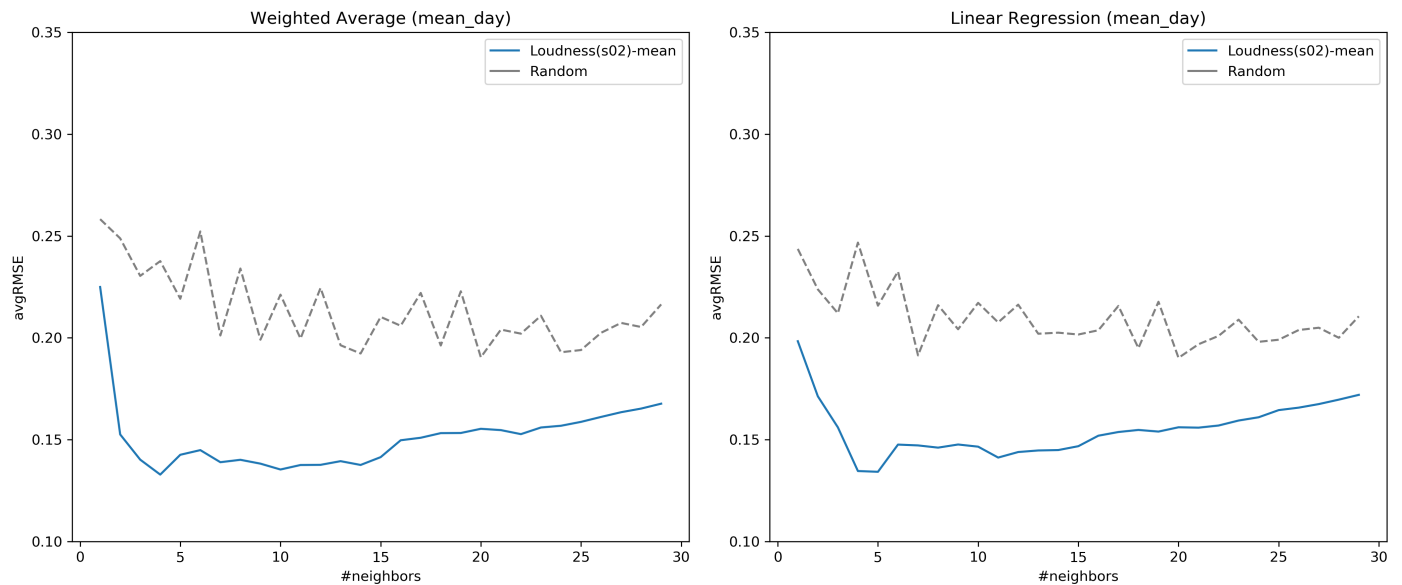

Figure S1. RMSE over Loudness-(s02)

## 2. RQ2:User Outlierness

The two reference (termed as Ref) users who have differences in their tinnitus loudness and distress observations are shown:

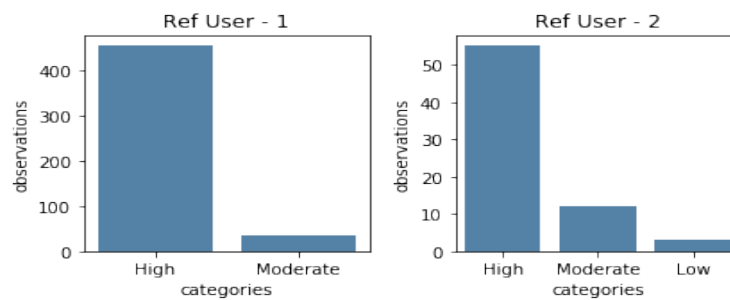

Figure S2. User's recordings distributed across the categories for loudness(s02)

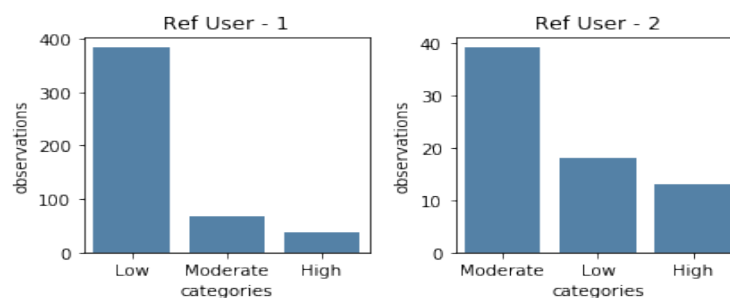

Figure S3. User's recordings distributed across the categories for tinnitus distress(s03)
